# Supplementary material for: A Positive Relationship between Betel Nut Chewing and Significant Liver Fibrosis in NAFLD Subjects, but Not in Non-NAFLD Ones
Source: PubMed Central journal article supplement (PMC7998430; doi:10.3390/nu13030914), 2021-03-11
Supplement: nutrients-13-00914-s001.pdf [file nutrients-13-00914-s001.pdf]

**Table S1.** Comparisons of participants' clinical characteristics between NAFLD subjects with and without betel nut chewing.

| Variables                                    | Betel Nut Chewing |               | p-Value |
|----------------------------------------------|-------------------|---------------|---------|
|                                              | No (n = 1772)     | Yes (n = 143) |         |
| Age, years                                   | 48.47 ± 11.2      | 45.9 ± 10.8   | 0.009   |
| Male                                         | 1251 (70.6)       | 141 (98.6)    | <0.001  |
| BMI, kg/m <sup>2</sup>                       | 26.7 ± 3.1        | 27.6 ± 3.6    | 0.004   |
| SBP, mmHg                                    | 121.0 ± 15.8      | 125.5 ± 17.2  | 0.001   |
| DBP, mmHg                                    | 72.2 ± 10.4       | 75.2 ± 11.4   | 0.001   |
| FPG, mg/dL                                   | 96.6 ± 24.2       | 100.4 ± 28.7  | 0.074   |
| ALT, U/L                                     | 40.2 ± 28.4       | 50.6 ± 41.0   | 0.003   |
| AST, U/L                                     | 27.9 ± 16.2       | 38.9 ± 45.3   | 0.008   |
| Cholesterol, mg/dL                           | 205.4 ± 36.1      | 209.2 ± 38.6  | 0.233   |
| Triglyceride, mg/dL                          | 164.5 ± 96.3      | 237.7 ± 185.9 | <0.001  |
| HDL-C, mg/dL                                 | 43.68 ± 10.1      | 39.1 ± 10.3   | <0.001  |
| Cholesterol/HDL-C                            | 4.9 ± 1.8         | 5.7 ± 1.6     | <0.001  |
| Creatinine, mg/dL                            | 0.90 ± 0.22       | 0.95 ± 0.14   | <0.001  |
| Uric acid, mg/dL                             | 6.6 ± 1.4         | 7.0 ± 1.6     | 0.005   |
| Hypertension                                 | 316 (17.8)        | 37 (25.9)     | 0.017   |
| Diabetes mellitus                            | 267 (15.1)        | 28 (19.6)     | 0.150   |
| Alcohol consumption, gm/wk                   | 12.5 ± 24.8       | 34.5 ± 29.9   | <0.001  |
| Cumulative smoking, pack-year                | 4.8 ± 12.9        | 19.4 ± 17.6   | <0.001  |
| Exercise ≥ 3/wk                              | 199 (11.2)        | 12 (8.4)      | 0.297   |
| Betel nut chewing, none                      | 1772 (100)        | 0 (0)         | <0.001  |
| Ex-chewing                                   | 0 (0)             | 89 (62.2)     |         |
| Current                                      | 0 (0)             | 54 (37.8)     |         |
| Duration of betel nut use, years             | 0 ± 0             | 10.9 ± 8.2    | <0.001  |
| Duration of betel nut use, none              | 1772 (100)        | 0 (0)         | <0.001  |
| ≤10 years                                    | 0 (0)             | 96 (67.1)     |         |
| >10 years                                    | 0 (0)             | 47 (32.9)     |         |
| Quantity of betel nut use per day            | 0 ± 0             | 13.0 ± 9.8    | <0.001  |
| Quantity of betel nut use, none              | 1772 (100)        | 0 (0)         | <0.001  |
| ≤5 pieces/day                                | 0 (0)             | 32 (22.4)     |         |
| >5 pieces/day                                | 0 (0)             | 111 (77.6)    |         |
| Cumulative exposure of betel nut, piece-year | 0 ± 0             | 162.0 ± 198.8 | <0.001  |
| Cumulative exposure, none                    | 1772 (100)        | 0 (0)         | <0.001  |
| ≤100 piece-year                              | 0 (0)             | 68 (47.6)     |         |
| >100 piece-year                              | 0 (0)             | 75 (52.4)     |         |
| APRI score                                   | 0.29 ± 0.22       | 0.42 ± 0.56   | 0.004   |
| APRI score ≥ 0.5                             | 126 (7.1)         | 24 (16.9)     | <0.001  |
| NFS                                          | -2.87 ± 1.18      | -2.53 ± 1.25  | 0.002   |
| NFS ≥ -1.455                                 | 347 (19.6)        | 42 (29.4)     | 0.005   |

Data expressed as mean ± standard deviation or number (percent). NAFLD: non-alcoholic fatty liver disease, BMI: body mass index, SBP: systolic blood pressure, DBP: diastolic blood pressure, FPG: fasting plasma glucose, ALT: alanine aminotransferase, AST: aspartate aminotransferase, HDL-C, high-density lipoprotein-cholesterol, eGFR: estimated glomerular filtration rate, APRI: AST to Platelet Ratio Index, NFS:NAFLD fibrosis score. Normal reference value: FPG: < 100mg/dL, AST: male:10–50 U/L, female:10–35 U/L, ALT: male: < 50 U/L, female: < 35 U/L, Cholesterol: < 200mg/dL, Triglyceride: <150 mg/dL, HDL-C: male: > 40 mg/dL, female: >50 mg/dL, Creatinine: male:0.70–1.20 mg/dL, female:0.50–0.90 mg/dL, Uric acid: male: <7mg/dL, female: < 6mg/dL.

**Table S2.** Logistic regression model for risk of significant liver fibrosis (defined as APRI  $\geq 0.5$ ).

| Variables                        | Multivariate Analysis <sup>a</sup> |                 |
|----------------------------------|------------------------------------|-----------------|
|                                  | OR (95% CI)                        | <i>p</i> -Value |
| NAFLD (+), Betel nut chewing (-) | Reference                          |                 |
| NAFLD (-), Betel nut chewing (-) | 0.43 (0.30–0.61)                   | <0.001          |
| NAFLD (-), Betel nut chewing (+) | 0.48 (0.19–1.23)                   | 0.127           |
| NAFLD (+), Betel nut chewing (+) | 2.37 (1.42–3.95)                   | 0.001           |

NAFLD: non-alcoholic fatty liver disease, APRI: AST/platelet ratio index, BMI: body mass index, HDL-C: high-density lipoprotein cholesterol, OR: odds ratio, CI: confidence interval. <sup>a</sup> Adjusted for age, sex, BMI, hypertension, diabetes, Cholesterol/HDL-C  $\geq 5$ , Hyperuricemia, cumulative exposure of smoking (pack-year) and alcohol consumption amount (g/week).
